# Supplementary material for: Association between Genetic Polymorphism of SCN1A, GABRA1 and ABCB1 and Drug Responsiveness in Vietnamese Epileptic Children
Source: MDPI journal article supplement (doi:10.3390/medicina60040637), 2024-04-16
Supplement: s1 [file s1]

Supplementary data

Table S1

| SNP                        | Genotype | Observed<br>N = 213 | Expected | $\chi^2$ | p-HWE   |
|----------------------------|----------|---------------------|----------|----------|---------|
| <i>SCN1A</i><br>rs2298771  | GG       | 2                   | 3,052817 | -        | 0,9411* |
|                            | AA       | 164                 | 165,0528 |          |         |
|                            | AG       | 47                  | 44,89437 |          |         |
| <i>SCN1A</i><br>rs3812718  | CC       | 38                  | 33,12676 | 1,955    | 0,3763  |
|                            | CT       | 92                  | 101,7465 |          |         |
|                            | TT       | 83                  | 78,12676 |          |         |
| <i>SCN1A</i><br>rs10188577 | AA       | 150                 | 149,588  | 0,043    | 0,9786  |
|                            | AG       | 57                  | 57,82394 |          |         |
|                            | GG       | 6                   | 5,588028 |          |         |
| <i>GABRA1</i><br>rs2279020 | GG       | 48                  | 55,77934 | 4,551    | 0,1027  |
|                            | GA       | 122                 | 106,4413 |          |         |
|                            | AA       | 43                  | 50,77934 |          |         |
| <i>ABCB1</i><br>rs1128503  | TT       | 88                  | 86,19836 | 0,284    | 0,8674  |
|                            | TC       | 95                  | 98,60329 |          |         |
|                            | CC       | 30                  | 28,19836 |          |         |
| <i>ABCB1</i><br>rs1045642  | TT       | 25                  | 29,30047 | 1,595    | 0,4505  |
|                            | TC       | 108                 | 99,39906 |          |         |
|                            | CC       | 80                  | 84,30047 |          |         |

N: number of individuals, \*Fisher's exact test
